# Supplementary material for: Variations in ORAI1 Gene Associated with Kawasaki Disease
Source: PubMed Central journal article supplement (PMC4720480; doi:10.1371/journal.pone.0145486), 2016-01-20
Supplement: pone.0145486.s003.pdf [file pone.0145486.s003.pdf]

**a** p.G20A and p.A42\_P43insPP

```

Mus musculus      12  SNPELPVSGGSSTSGSRRSRRRSGDGEPSGAPPLPPPPPAVSYPDWIGQSYSEVMSLNEH 71
Rattus norvegicus 12  SNPELPLSGGSSTSGSRRSRRRSGDGEPTGAPPLPPP-AVSYPDWIGQSYSEVMSLNEH 70
Canis lupus familiaris 121 NSPELPLGGGSTTSGSRRSRRRSGDGEPPGSPPPP---AAVTYPDWIGQTYSEVMSLNEH 177
Felis catus      12  NSPELPFSGGSSTTSGSRRSRRRSGDGETPGSSPPPP---AAVTYPDWIGQTYSEVMSLNEH 68
Bos taurus       12  NSPELPLSGGNSTSGSRRSRRRSGDGEPPGSPPPPPP-PAVTYPDWIGQSYSEVMSLNEH 70
Sus scrofa       12  NSPELPLSGGSSTTSGSRRSRRHSGDGEPPGSPPPPPP-PAVTYPDWIGQSYSEVMSLNEH 71
Homo sapiens     12  SSPELPPSGGSTTSGSRRSRRRSGDGEPPGAPPPPP-SAVTYPDWIGQSYSEVMSLNEH 69
Gallus gallus    -----MSLNEH 6
Xenopus laevis   7  -----VETKSRPCSKQLQE-----EVSYPEWISRSYVELMSLNEH 41
  
```

**b** p.S218G

```

Mus musculus      192 EVVLLCWVKFLPLKRQAGQPSPT-KPPAE-SVIVANESDSSGITPGEAAAIASTAIMVPC 249
Rattus norvegicus 191 EVVLLCWVKFLPLKRQAGQPSPT-KPTEPAVVANSSNNGGITPGEAAAIASTAIMVPC 249
Canis lupus familiaris 298 EVVLLCWVKFLPLKKQPGQPRPTSKPPAGSAVASVNGSSTGGITPGQAAAIASTTIMVPF 357
Felis catus      189 EVVLLCWVKFLPLKKQPGQLRPTSKPPATDAVANVS--STGGITPGQAAAIASTTIMVPF 246
Bos taurus       191 EVVLLCWVKFLPLKKQPGQLRPTSKPPAGGAAANVS--STGGITPGQAAAIASTTIMVPF 248
Sus scrofa       192 EVVLLCWVKFLPLKKQPGQPRPTSKPPSSSEATNVSSSSPGGITPGQAAAIASTTIMVPF 251
Homo sapiens     190 EVVLLCWVKFLPLKKQPGQPRPTSKPPASGAAANVS---TSGITPGQAAAIASTTIMVPF 246
Gallus gallus    127 EVVLLCWVKFLPLKKNPLDPAEN-----SNSSITSGQAAAIASTSIMVPF 171
Xenopus laevis   162 EVVLLCWVKFLPVNSPKISSNET-----SAVSSGQAAAITSTAIMVPF 204
  
```

**c**

|                | SIFT               | Polyphen       |
|----------------|--------------------|----------------|
| p.G20A         | Deleterious (0.02) | Unknown (0)    |
| p.A42_P43insPP | NA                 | NA             |
| p.S218G        | Tolerated (0.5)    | Benign (0.001) |

**S3 Fig. Prediction of impact of the amino acid sequence alterations on ORAI1 function.**

(a, b) Multiple species sequence alignment of ORAI1 proteins. Positions of variants are highlighted in boldface type and yellow background color.

(c) Results of *in silico* prediction of the nature of amino acid sequence alterations. Prediction by SIFT and Polyphen-2 methods were conducted with the Variant Effect Predictor (<http://ensembl.org/info/docs/tools/vep/index.html>) web tool.
